# Supplementary material for: Three-dimensional modeling of single stranded DNA hairpins for aptamer-based biosensors
Source: PubMed Central journal article supplement (PMC5430850; doi:10.1038/s41598-017-01348-5), 2017-04-26
Supplement: 41598_2017_1348_MOESM1_ESM.pdf [file 41598_2017_1348_MOESM1_ESM.pdf]

# **Three-dimensional modeling of single stranded DNA hairpins for aptamer-based biosensors**

Iman Jeddi<sup>1</sup> and Leonor Saiz<sup>1,\*</sup>

<sup>1</sup>Modeling of Biological Networks and Systems Therapeutics Laboratory, Department of Biomedical Engineering, University of California, 451 East Health Sciences Drive, Davis, CA 95616, USA.

## **Corresponding author:**

Leonor Saiz

Department of Biomedical Engineering

University of California

451 E. Health Sciences Drive, Davis, CA 95616, USA

Tel: (530) 752-6700

Fax: (530) 754-5739

Email: [lsaiz@ucdavis.edu](mailto:lsaiz@ucdavis.edu)

**Keywords:** aptamer, hairpin, single stranded DNA, computational modeling, biosensor

---

\* To whom correspondence should be addressed: [lsaiz@ucdavis.edu](mailto:lsaiz@ucdavis.edu)

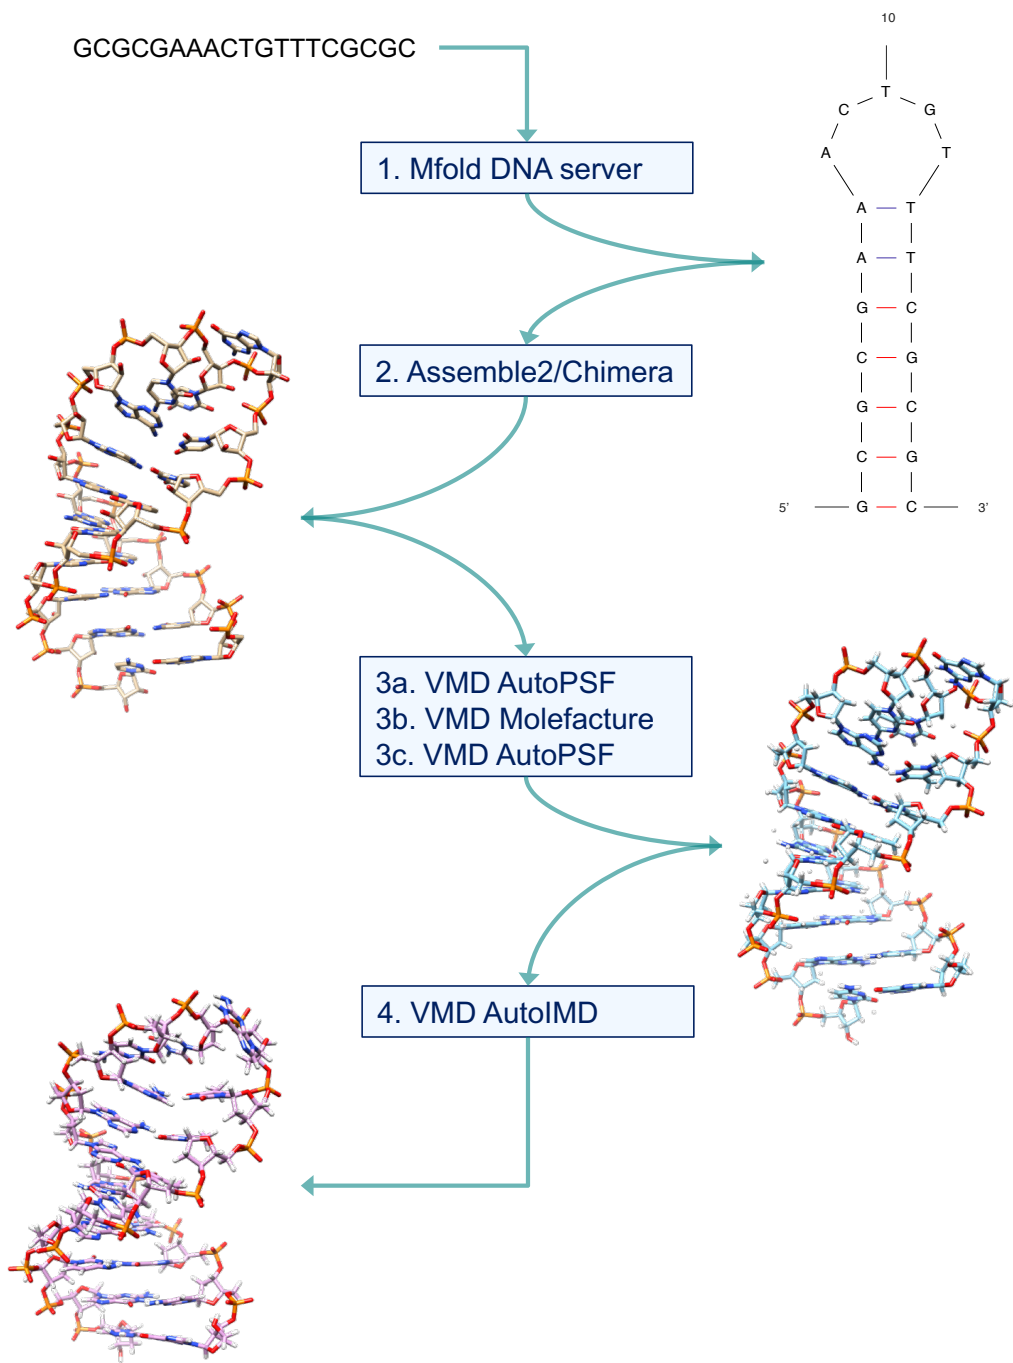

**Supplementary Figure 1:** Structures obtained at the end of each of the four steps of the workflow for the sequence GCGCGAAACTGTTTCGCGC of the structure with PDB ID 1ECU.
